# Supplementary material for: Transcriptome analysis and safety profile of the early-phase clinical response to an adjuvanted grass allergoid immunotherapy
Source: PubMed Central journal article supplement — World Allergy Organ J. 2019 Nov 16;12(11):100087. doi: 10.1016/j.waojou.2019.100087 (PMC6872854; doi:10.1016/j.waojou.2019.100087), 2019-11-16
Supplement: mmc1.pdf [file mmc1.pdf]

**Supplemental Table**

**Table S1: Summary of differentially expressed genes associated with Grass MATA MPL SCIT**

| Cell type                                                                             | Gene    | Type                   | Expression fold -change | Expression p-value (p<0.05) | Potential Biomarkers of AIT (EAACI 2017)* |
|---------------------------------------------------------------------------------------|---------|------------------------|-------------------------|-----------------------------|-------------------------------------------|
| Basophils/eosinophils                                                                 | CCL2    | chemokine              | ↑1.778                  | 0.0118                      | ✓                                         |
|                                                                                       | CCL7    | chemokine, eotaxin     | ↑1.778                  | 0.0118                      |                                           |
|                                                                                       | CCL8    | chemokine              | ↑1.778                  | 0.0118                      |                                           |
|                                                                                       | CCL11   | chemokine, eotaxin     | ↑1.778                  | 0.0118                      |                                           |
|                                                                                       | CCL13   | chemokine              | ↑1.825                  | 0.0102                      | N/A                                       |
|                                                                                       | CCL24   | chemokine, eotaxin     | ↑1.765                  | 0.012                       |                                           |
|                                                                                       | CCL26   | chemokine, eotaxin     | ↑1.589                  | 0.0128                      |                                           |
|                                                                                       | EPX     | enzyme                 | ↑1.307                  | 0.00584                     |                                           |
| T lymphocytes/B lymphocytes/Dendritic cells/monocytes chemotaxis, adherence/migration | CCL16   | chemokine, cytokine    | ↑1.782                  | 0.00783                     |                                           |
|                                                                                       | CCL17   | chemokine/cytokine     | ↑1.802                  | 0.0106                      |                                           |
|                                                                                       | CCL19   | chemokine              | ↑1.774                  | 0.0109                      | N/A                                       |
|                                                                                       | CCL22   | chemokine              | ↑1.733                  | 0.0122                      |                                           |
|                                                                                       | ICAM2   | transmembrane receptor | ↑1.246                  | 0.0482                      |                                           |
| Th1 cells                                                                             | IL2     | cytokine               | ↑1.843                  | 0.00738                     | ✓                                         |
|                                                                                       | CSF2    | cytokine               | ↑1.82                   | 0.01                        | N/A                                       |
|                                                                                       | IL3     | cytokine               | ↑1.798                  | 0.0113                      | ✓                                         |
|                                                                                       | CSF3    | cytokine               | ↑1.719                  | 0.0124                      | N/A                                       |
|                                                                                       | IL12B   | cytokine               | ↑1.617                  | 0.0137                      | ✓                                         |
|                                                                                       | IFNβ1   | cytokine               | ↑1.6                    | 0.0158                      | N/A                                       |
|                                                                                       | IL27    | cytokine               | ↑1.518                  | 0.0148                      | N/A                                       |
|                                                                                       | CD80    | transmembrane receptor | ↑1.306                  | 0.00686                     | ✓                                         |
|                                                                                       | TNF     | cytokine               | ↑1.275                  | 0.0177                      | ✓                                         |
|                                                                                       | IL18    | cytokine               | ↑1.244                  | 0.0203                      | ✓                                         |
|                                                                                       | CD4     | transmembrane receptor | ↑1.164                  | 0.0126                      | N/A                                       |
|                                                                                       | IL12RB2 | transmembrane receptor | ↑1.109                  | 0.0445                      | ✓                                         |

**Table S1: Summary of differentially expressed genes associated with Grass MATA MPL SCIT**

| Cell type                      | Gene         | Type                                                          | Expression fold -change | Expression p-value (p<0.05) | Potential Biomarkers of AIT (EAACI 2017)* |
|--------------------------------|--------------|---------------------------------------------------------------|-------------------------|-----------------------------|-------------------------------------------|
| Th2/Th17 cells                 | IL13         | cytokine                                                      | ↑1.786                  | 0.0106                      | ✓                                         |
|                                | IL9          | cytokine                                                      | ↑1.778                  | 0.0118                      | ✓                                         |
|                                | IL25         | cytokine                                                      | ↑1.727                  | 0.0149                      | N/A                                       |
|                                | IL4          | cytokine                                                      | ↑1.624                  | 0.00738                     | ✓                                         |
|                                | IL24         | cytokine                                                      | ↑1.184                  | 0.0362                      | N/A                                       |
|                                | IL5          | cytokine                                                      | ↑1.07                   | 0.0446                      | ✓                                         |
|                                | IL21         | cytokine                                                      | ↑1.786                  | 0.0099                      | N/A                                       |
| T regulatory                   | NR4A3        | ligand-dependent nuclear receptor                             | ↑1.645                  | 0.0108                      | N/A                                       |
|                                | NR4A1        | ligand-dependent nuclear receptor/member of Nur77-RXRa family | ↑1.334                  | 0.0241                      | N/A                                       |
|                                | FOXP3        | transcription regulator                                       | ↑1.288                  | 0.0137                      | ✓                                         |
|                                | STAT5A       | transcription regulator                                       | ↑1.238                  | 0.0226                      | N/A                                       |
|                                | RUNX1        | transcription regulator                                       | ↑1.124                  | 0.0357                      | N/A                                       |
| Antigen presentation           | CMA1         | serine protease                                               | ↑1.872                  | 0.00862                     |                                           |
|                                | KITLG        | growth factor                                                 | ↑1.762                  | 0.0123                      |                                           |
|                                | TPSAB1/TPSB2 | peptidase                                                     | ↑1.768                  | 0.00802                     | N/A                                       |
|                                | KIT          | transmembrane receptor                                        | ↑1.411                  | 0.0027                      |                                           |
|                                | HLA-DMA      | transmembrane receptor                                        | ↑1.155                  | 0.0383                      |                                           |
| B cells                        | CD70         | transmembrane receptor (TNF-receptor superfamily)             | ↑1.641                  | 0.00135                     | N/A                                       |
|                                | CD1A         | transmembrane receptor                                        | ↑1.392                  | 0.00976                     |                                           |
| Toll-like Rc signalling (TLR4) | TOLLIP       | other                                                         | ↑1.362                  | 0.0296                      |                                           |
|                                | TAB1         | TGFβ activated kinase                                         | ↑1.303                  | 0.0181                      |                                           |
|                                | MAP3K7       | kinase                                                        | ↓-1.091                 | 0.0456                      | N/A                                       |
|                                | IRF7         | interferon regulatory factor                                  | ↓-1.246                 | 0.0397                      |                                           |
| non-classified                 | GATA4        | transcription regulator                                       | ↑1.775                  | 0.0118                      | N/A                                       |

\* M. H. Shamji, J. H. Kappen, M. Akdis et al., "Biomarkers for monitoring clinical efficacy of allergen immunotherapy for allergic rhinoconjunctivitis and allergic asthma: an EAACI Position Paper", *Allergy*, vol. 72, no. 8, pp. 1156-1173, 2017.
